# Supplementary material for: The interactions of an Aβ protofibril with a cholesterol-enriched membrane and involvement of neuroprotective carbazolium-based substances
Source: Royal Society of Chemistry journal article supplement (doi:10.1039/c9cp00859d), 2019-01-01
Supplement: c9cp00859d1.pdf [file c9cp00859d1.pdf]

## The Interactions of A $\beta$ Protofibril with Cholesterol Enriched Membrane and Involvement of Neuroprotective Cabazolium Based Substances

Hedayat Karimi,<sup>1</sup> Maryam Heydari Dokoohaki,<sup>1</sup> Amin Reza Zolghadr<sup>1\*</sup>, Mohammad Hadi Ghatee<sup>1</sup>

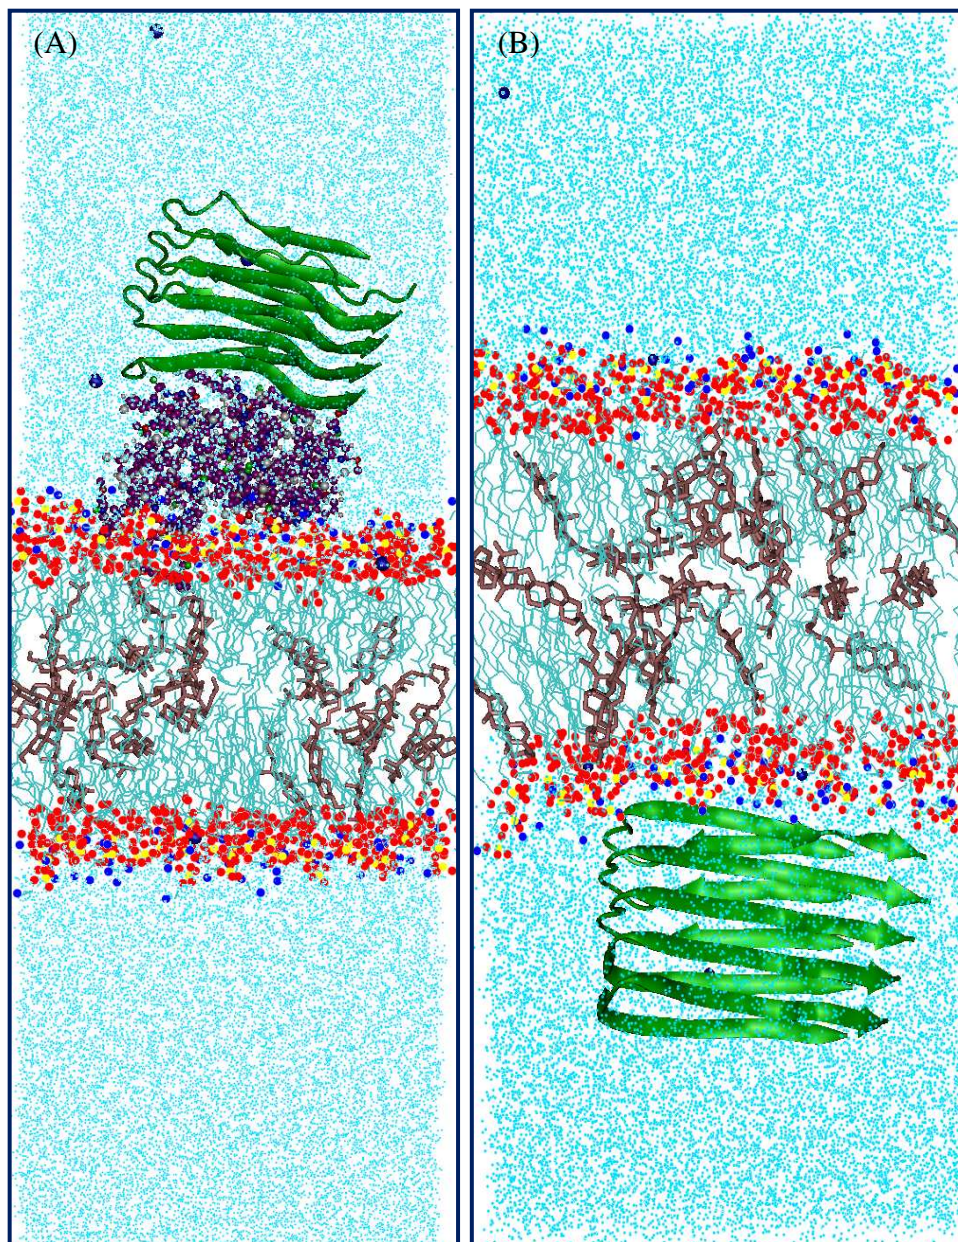

**Fig. S1.** The snapshot of two independent simulations A) A $\beta$  peptide on lipid bilayer and B) A $\beta$  peptide and P7C3-S243 on lipid bilayer.

<sup>1</sup> Department of Chemistry, Shiraz University, Shiraz, 71946-84795, Iran



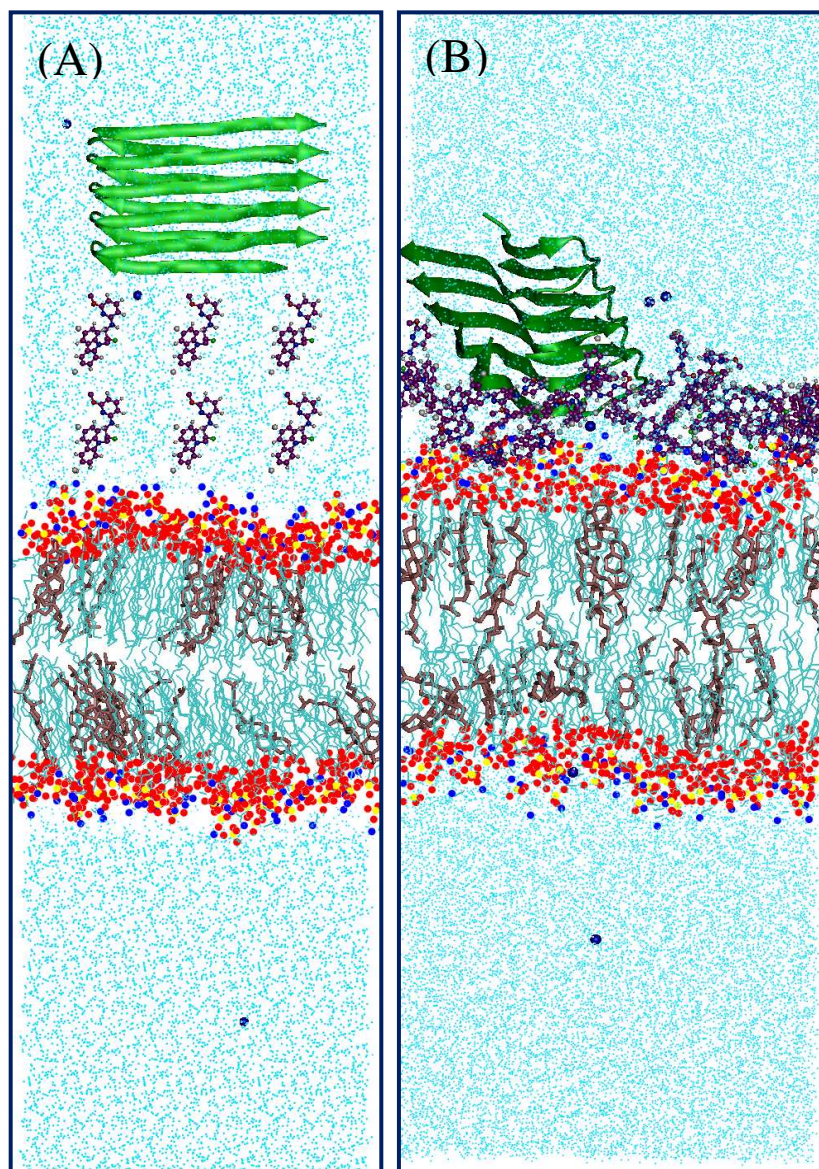

**Fig. S2.** Snapshot of a simulation with another orientation of the drug candidate. A) initial structure and B) equilibrated structure.

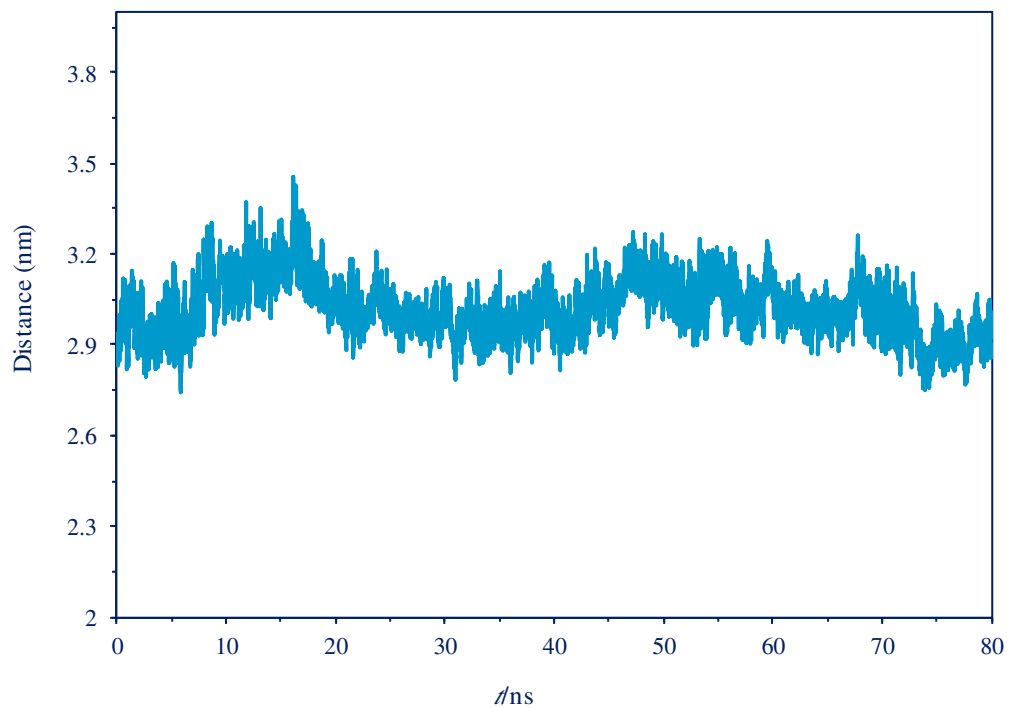

**Fig. S3.** The evolution of distance between the center of down leaflet of bilayer and A $\beta$  amyloid (down zone) in the last of 80 ns of the simulation.

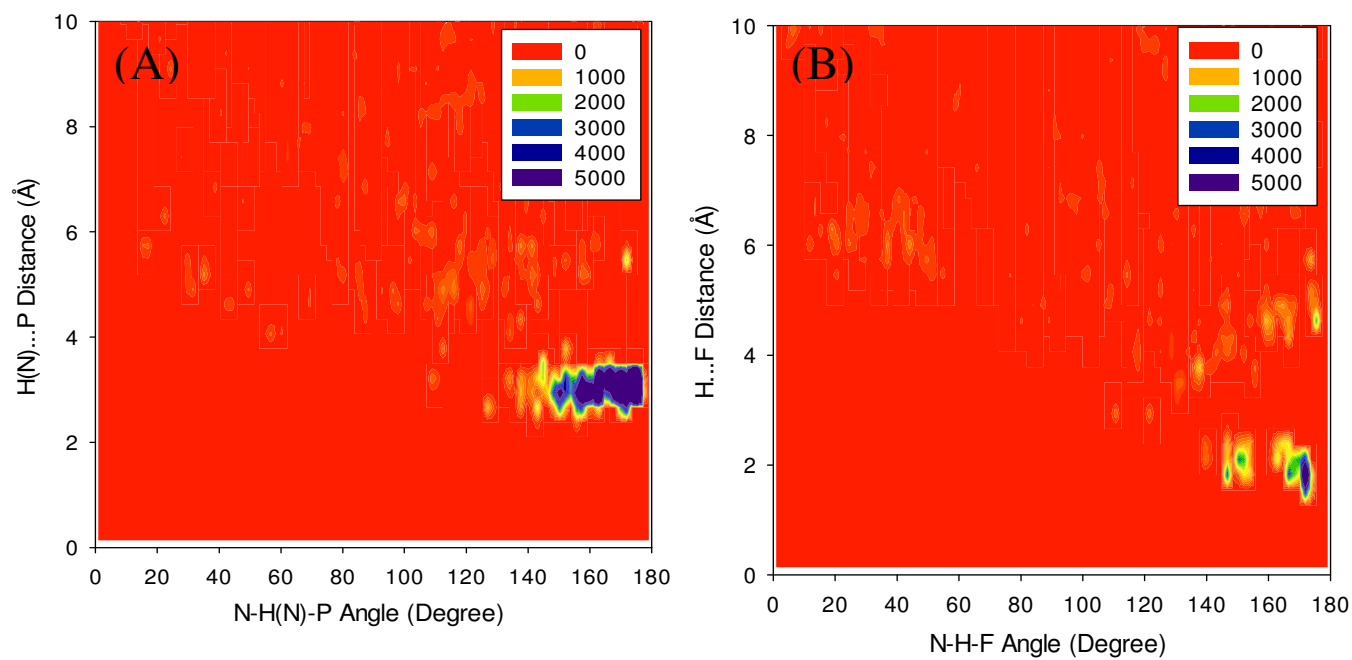

**Fig. S4.** The combined radial/angular distribution functions of the drug candidate with (A) POPC, and (B) oligomer.

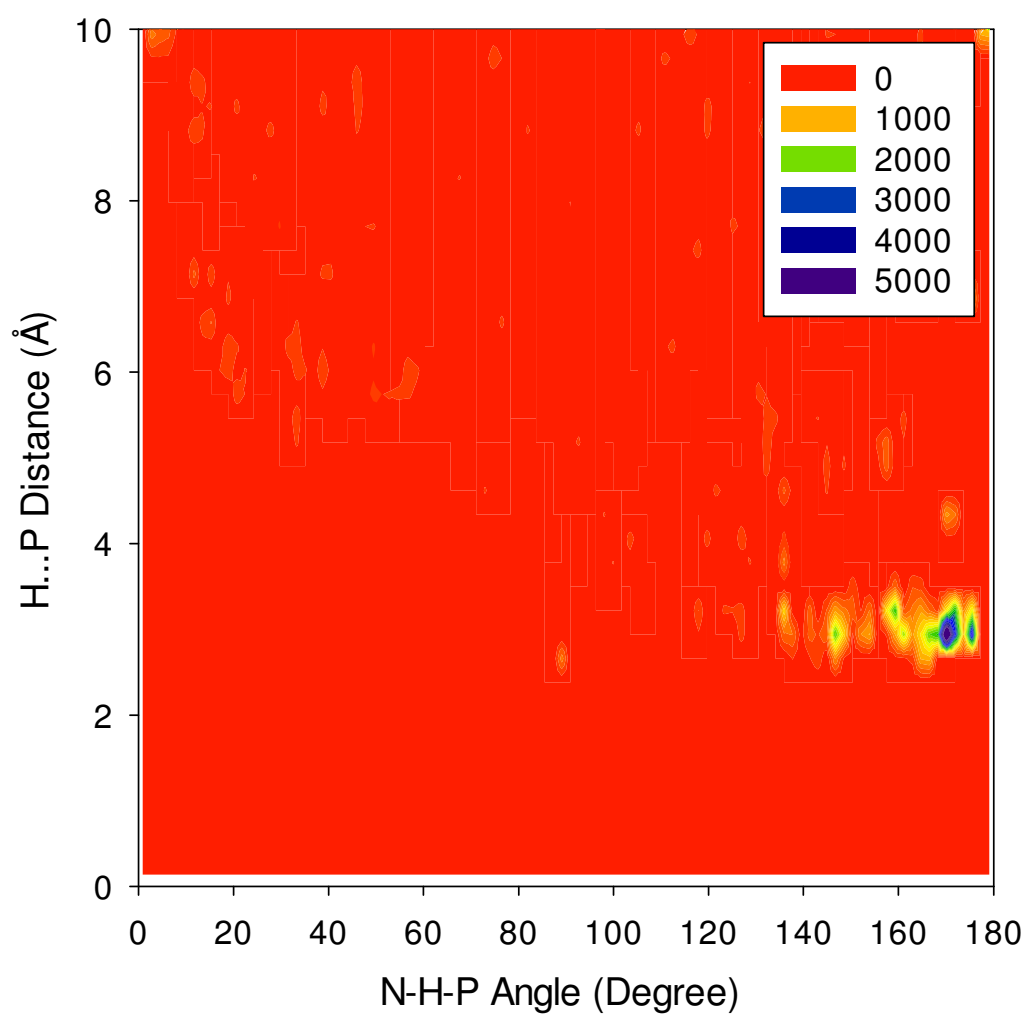

**Fig. S5.** Combined radial/angular distribution functions for investigation of interactions between A $\beta$  amyloid oligomer and the lipid bilayer in the presence of drug candidate (upper leaflet).
